# Supplementary material for: Fabrication of Perfusable Vascular Channels and Capillaries in 3D Liver-like Tissue
Source: PubMed Central journal article supplement (PMC7156376; doi:10.1038/s41598-020-62286-3), 2020-04-14
Supplement: 41598_2020_62286_MOESM1_ESM.pdf [file 41598_2020_62286_MOESM1_ESM.pdf]

## Supporting Information

### **Fabrication of Perfusable Vascular Channels and Capillaries in 3D Liver-like Tissue**

*Nobuhito Mori, Yuka Akagi, Yukiko Imai, Yuzo Takayama and Yasuyuki S. Kida*

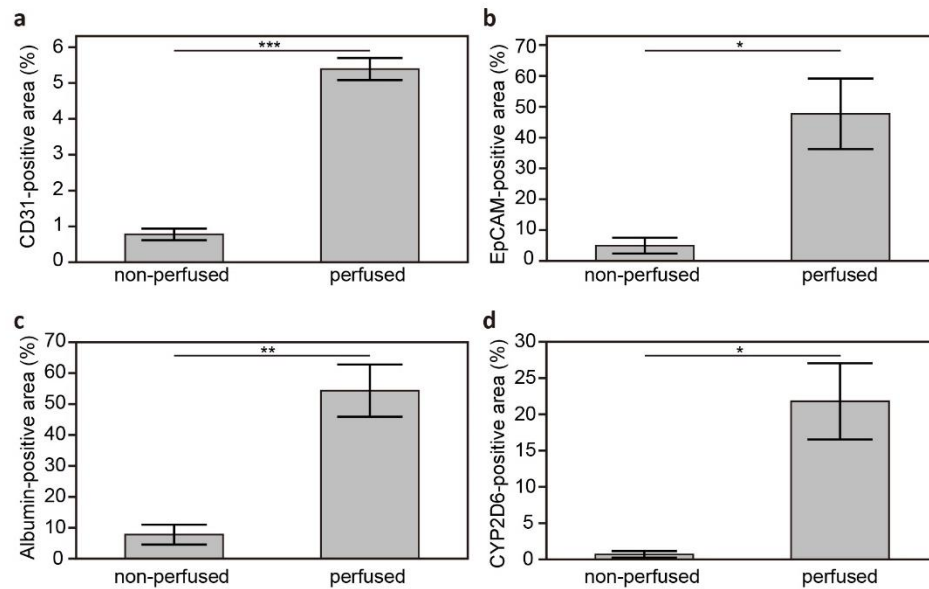

**Figure S1.** Quantification of immunostained images. The areas of fluorescence corresponding to CD31 (a), EpCAM (b), albumin (c), and CYP2D6 (d) were measured using ImageJ. For each image, the fluorescence-positive pixels were extracted based on a threshold. Subsequently, the fluorescence-positive areas within 200  $\mu\text{m}$  from the main channel and with a width of 100  $\mu\text{m}$  were measured based on four ROIs. The percentage of the fluorescence-positive area in the ROI (200  $\mu\text{m}$   $\times$  100  $\mu\text{m}$ ) was calculated. The data are shown as mean  $\pm$  SE ( $n = 3$ ). \* $p < 0.05$ , \*\* $p < 0.01$ , \*\*\* $p < 0.001$ , Student's t-test.

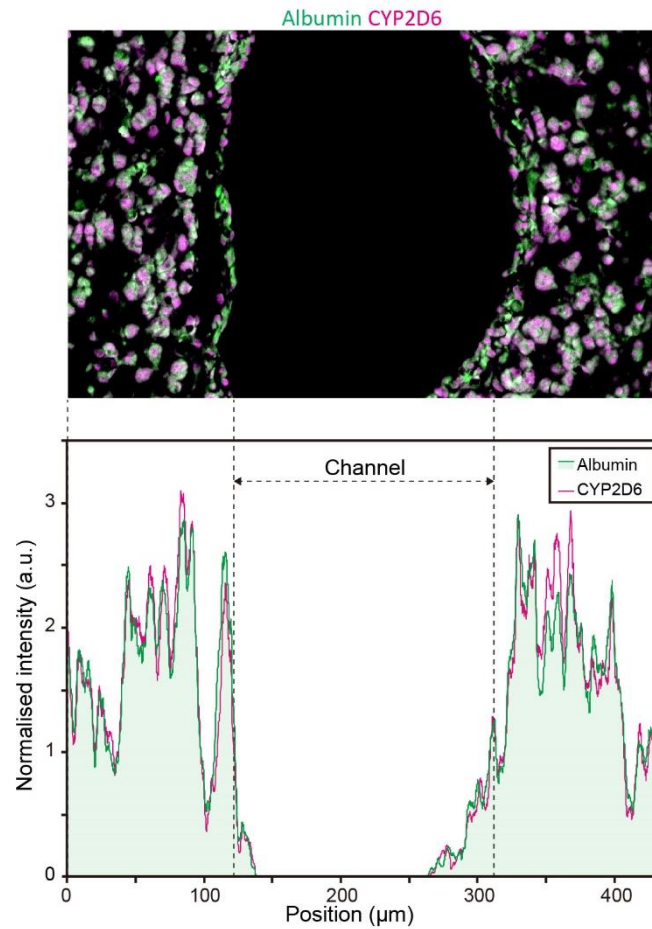

**Figure S2.** Intensity profile of immunofluorescence for albumin (green line with faint fill) and CYP2D6 (magenta line) in the perfused tissue. The horizontal intensity profile of the upper image was acquired by vertical projection of the intensity using ImageJ. Each intensity value for albumin and CYP2D6 was normalised by each integrated intensity.

| EnsemblID       | Symbol   | logFC | logCPM | FDR      | EnsemblID       | Symbol  | logFC | logCPM | FDR      |
|-----------------|----------|-------|--------|----------|-----------------|---------|-------|--------|----------|
| ENSG0000010932  | FMO1     | -3.72 | 1.73   | 3.89e-12 | ENSG00000100197 | CYP2D6  | 0.29  | 0.29   | 7.20e-01 |
| ENSG0000019186  | CYP24A1  | 1.34  | 2.22   | 2.50e-05 | ENSG00000111275 | ALDH2   | -0.07 | 5.89   | 7.21e-01 |
| ENSG00000186204 | CYP4F12  | -1.56 | 1.89   | 4.81e-05 | ENSG00000006534 | ALDH3B1 | -0.09 | 4.88   | 7.29e-01 |
| ENSG00000186529 | CYP4F3   | -1.15 | 3.47   | 1.23e-04 | ENSG00000076258 | FMO4    | -0.44 | -1.13  | 7.69e-01 |
| ENSG00000106258 | CYP3A5   | 0.88  | 2.67   | 6.58e-04 | ENSG00000003137 | CYP26B1 | -0.20 | 0.98   | 7.89e-01 |
| ENSG00000188641 | DPYD     | 0.60  | 3.74   | 1.73e-03 | ENSG00000119711 | ALDH6A1 | -0.07 | 3.96   | 8.14e-01 |
| ENSG00000138061 | CYP1B1   | -2.10 | 0.03   | 2.62e-03 | ENSG00000128918 | ALDH1A2 | 0.17  | 1.29   | 8.22e-01 |
| ENSG00000180432 | CYP8B1   | -1.05 | 2.40   | 4.09e-03 | ENSG00000172955 | ADH6    | 0.14  | 1.25   | 8.70e-01 |
| ENSG00000154277 | UCHL1    | -0.60 | 3.85   | 6.81e-03 | ENSG00000095303 | PTGS1   | 0.03  | 5.03   | 9.17e-01 |
| ENSG00000073756 | PTGS2    | 0.44  | 4.53   | 3.03e-02 | ENSG00000158125 | XDH     | -0.11 | -1.17  | 1.00e+00 |
| ENSG00000189221 | MAOA     | 0.32  | 5.53   | 3.55e-02 | ENSG00000130649 | CYP2E1  | 0.02  | 0.53   | 1.00e+00 |
| ENSG00000197894 | ADH5     | -0.28 | 6.64   | 5.11e-02 | ENSG00000197408 | CYP2B6  | -0.07 | -1.08  | 1.00e+00 |
| ENSG00000112294 | ALDH5A1  | -0.31 | 4.71   | 7.05e-02 | ENSG00000148795 | CYP17A1 | -0.02 | -0.92  | 1.00e+00 |
| ENSG00000131781 | FMO5     | 1.05  | 0.03   | 8.02e-02 | ENSG00000114771 | AADAC   |       |        |          |
| ENSG00000095596 | CYP26A1  | 1.26  | -0.49  | 1.06e-01 | ENSG00000187758 | ADH1A   |       |        |          |
| ENSG00000072506 | HSD17B10 | -0.26 | 4.73   | 1.20e-01 | ENSG00000196616 | ADH1B   |       |        |          |
| ENSG00000072210 | ALDH3A2  | -0.24 | 5.17   | 1.43e-01 | ENSG00000248144 | ADH1C   |       |        |          |
| ENSG00000140465 | CYP1A1   | -0.94 | 0.74   | 1.63e-01 | ENSG00000196344 | ADH7    |       |        |          |
| ENSG00000140459 | CYP11A1  | -0.54 | 1.50   | 2.03e-01 | ENSG00000108602 | ALDH3A1 |       |        |          |
| ENSG00000167600 | CYP2S1   | 0.31  | 4.60   | 2.20e-01 | ENSG00000132746 | ALDH3B2 |       |        |          |
| ENSG00000135929 | CYP27A1  | -0.22 | 5.17   | 2.34e-01 | ENSG00000170835 | CEL     |       |        |          |
| ENSG00000118514 | ALDH8A1  | -1.58 | -1.37  | 2.44e-01 | ENSG00000160882 | CYP11B1 |       |        |          |
| ENSG00000139684 | ESD      | 0.18  | 6.50   | 2.69e-01 | ENSG00000179142 | CYP11B2 |       |        |          |
| ENSG00000137124 | ALDH1B1  | -0.20 | 4.95   | 2.78e-01 | ENSG00000140505 | CYP1A2  |       |        |          |
| ENSG00000143149 | ALDH9A1  | 0.20  | 4.49   | 3.11e-01 | ENSG00000187553 | CYP26C1 |       |        |          |
| ENSG00000186104 | CYP2R1   | -0.60 | 0.47   | 3.24e-01 | ENSG00000197838 | CYP2A13 |       |        |          |
| ENSG00000118939 | UCHL3    | 0.18  | 4.29   | 3.86e-01 | ENSG00000108242 | CYP2C18 |       |        |          |
| ENSG00000164904 | ALDH7A1  | 0.16  | 5.65   | 3.86e-01 | ENSG00000165841 | CYP2C19 |       |        |          |
| ENSG00000165092 | ALDH1A1  | 0.24  | 3.04   | 4.17e-01 | ENSG00000138115 | CYP2C8  |       |        |          |
| ENSG00000198099 | ADH4     | 0.62  | -0.41  | 4.91e-01 | ENSG00000138109 | CYP2C9  |       |        |          |
| ENSG00000073067 | CYP2W1   | -0.13 | 5.26   | 4.92e-01 | ENSG00000197446 | CYP2F1  |       |        |          |
| ENSG00000231852 | CYP21A2  | -0.37 | 0.90   | 5.26e-01 | ENSG00000160868 | CYP3A4  |       |        |          |
| ENSG00000184254 | ALDH1A3  | 0.22  | 2.85   | 5.56e-01 | ENSG00000021461 | CYP3A43 |       |        |          |
| ENSG00000160870 | CYP3A7   | -0.48 | -0.11  | 5.56e-01 | ENSG00000187048 | CYP4A11 |       |        |          |
| ENSG00000159423 | ALDH4A1  | 0.11  | 5.98   | 5.64e-01 | ENSG00000162365 | CYP4A22 |       |        |          |
| ENSG00000111012 | CYP27B1  | -0.43 | 0.33   | 6.23e-01 | ENSG00000142973 | CYP4B1  |       |        |          |
| ENSG00000137869 | CYP19A1  | -0.18 | 2.15   | 6.77e-01 | ENSG00000171903 | CYP4F11 |       |        |          |
| ENSG00000069535 | MAOB     | 0.10  | 4.10   | 6.99e-01 | ENSG00000186115 | CYP4F2  |       |        |          |
|                 |          |       |        |          | ENSG00000186526 | CYP4F8  |       |        |          |
|                 |          |       |        |          | ENSG00000167910 | CYP7A1  |       |        |          |
|                 |          |       |        |          | ENSG00000172817 | CYP7B1  |       |        |          |
|                 |          |       |        |          | ENSG00000100867 | DHRS2   |       |        |          |
|                 |          |       |        |          | ENSG00000094963 | FMO2    |       |        |          |
|                 |          |       |        |          | ENSG00000007933 | FMO3    |       |        |          |
|                 |          |       |        |          | ENSG00000145649 | GZMA    |       |        |          |
|                 |          |       |        |          | ENSG00000100453 | GZMB    |       |        |          |

**Figure S3.** Fold-changes and expression levels of genes related to phase I drug metabolism. Undetected genes are shown without data. FC: fold-change, CPM: counts per million, FDR: false discovery rate.

| EnsemblID       | Symbol  | logFC | logCPM | FDR      | EnsemblID       | Symbol  | logFC | logCPM | FDR      |
|-----------------|---------|-------|--------|----------|-----------------|---------|-------|--------|----------|
| ENSG00000166741 | NNMT    | -0.98 | 7.19   | 4.15e-16 | ENSG00000168282 | MGAT2   | 0.18  | 4.00   | 4.09e-01 |
| ENSG00000187210 | GCNT1   | 1.55  | 3.62   | 1.76e-12 | ENSG00000148834 | GSTO1   | -0.13 | 6.56   | 4.22e-01 |
| ENSG00000130066 | SAT1    | 1.09  | 8.51   | 3.18e-11 | ENSG00000120915 | EPHX2   | -0.24 | 3.30   | 4.51e-01 |
| ENSG00000213366 | GSTM2   | -1.03 | 4.12   | 2.95e-10 | ENSG00000196433 | ASMT    | 0.79  | -0.81  | 4.77e-01 |
| ENSG00000148154 | UGCG    | 0.76  | 5.64   | 1.67e-09 | ENSG00000150540 | HNMT    | -0.16 | 5.39   | 4.82e-01 |
| ENSG00000008394 | MGST1   | -0.63 | 6.00   | 1.77e-07 | ENSG00000168765 | GSTM4   | -0.19 | 3.84   | 4.85e-01 |
| ENSG00000257594 | GALNT4  | -1.16 | 4.88   | 1.90e-07 | ENSG00000084207 | GSTP1   | 0.10  | 5.82   | 5.61e-01 |
| ENSG00000123983 | ACSL3   | 0.54  | 6.40   | 8.97e-06 | ENSG00000137364 | TPMT    | -0.13 | 4.07   | 6.21e-01 |
| ENSG00000068366 | ACSL4   | 0.48  | 7.03   | 8.54e-05 | ENSG00000198075 | SULT1C4 | 0.12  | 3.13   | 7.52e-01 |
| ENSG00000151726 | ACSL1   | -0.52 | 6.36   | 8.79e-05 | ENSG00000173418 | NAA20   | -0.06 | 5.14   | 7.88e-01 |
| ENSG00000171234 | UGT2B7  | -1.16 | 2.10   | 1.15e-04 | ENSG00000085871 | MGST2   | 0.06  | 5.25   | 8.06e-01 |
| ENSG00000241644 | INMT    | -6.10 | -1.42  | 1.13e-03 | ENSG00000088002 | SULT2B1 | 0.21  | 0.04   | 8.46e-01 |
| ENSG00000181019 | NQO1    | -0.56 | 7.03   | 1.30e-03 | ENSG00000134202 | GSTM3   | -0.04 | 5.22   | 8.53e-01 |
| ENSG00000134201 | GSTM5   | -3.75 | -1.27  | 2.28e-03 | ENSG00000066813 | ACSM2B  | -0.30 | -0.99  | 8.72e-01 |
| ENSG00000005187 | ACSM3   | -0.64 | 3.91   | 3.25e-03 | ENSG00000244038 | DDOST   | 0.03  | 9.05   | 8.89e-01 |
| ENSG00000143819 | EPHX1   | -0.47 | 4.86   | 4.15e-03 | ENSG00000093010 | COMT    | 0.02  | 6.50   | 9.33e-01 |
| ENSG00000124588 | NQO2    | -0.47 | 4.46   | 4.30e-03 | ENSG00000166743 | ACSM1   | 0.24  | -1.22  | 9.41e-01 |
| ENSG00000085998 | POMGNT1 | -0.37 | 5.77   | 5.38e-03 | ENSG00000141744 | PNMT    | 0.10  | 0.54   | 9.53e-01 |
| ENSG00000170899 | GSTA4   | -0.47 | 4.17   | 1.52e-02 | ENSG00000065621 | GSTO2   | -0.02 | 4.14   | 9.71e-01 |
| ENSG00000198203 | SULT1C2 | -0.75 | 2.34   | 1.52e-02 | ENSG00000124713 | GNMT    | 0.04  | 0.38   | 1.00e+00 |
| ENSG00000131446 | MGAT1   | 0.36  | 7.48   | 1.87e-02 | ENSG00000135220 | UGT2A3  | 0.03  | 1.09   | 1.00e+00 |
| ENSG00000136881 | BAAT    | 0.41  | 5.32   | 1.94e-02 | ENSG00000147119 | CHST7   | 0.01  | 1.39   | 1.00e+00 |
| ENSG00000105398 | SULT2A1 | 2.30  | -0.92  | 2.03e-02 | ENSG00000129673 | AANAT   |       |        |          |
| ENSG00000214435 | AS3MT   | -0.51 | 3.66   | 3.65e-02 | ENSG00000198848 | CES1    |       |        |          |
| ENSG00000172831 | CES2    | -0.36 | 4.85   | 4.22e-02 | ENSG00000159398 | CES5A   |       |        |          |
| ENSG00000143198 | MGST3   | -0.29 | 5.51   | 4.32e-02 | ENSG00000149124 | GLYAT   |       |        |          |
| ENSG00000148344 | PTGES   | -0.36 | 5.39   | 5.38e-02 | ENSG00000243955 | GSTA1   |       |        |          |
| ENSG00000171097 | KYAT1   | -0.32 | 4.02   | 1.03e-01 | ENSG00000174156 | GSTA3   |       |        |          |
| ENSG00000197448 | GSTK1   | -0.21 | 5.73   | 1.60e-01 | ENSG00000182793 | GSTA5   |       |        |          |
| ENSG00000197165 | SULT1A2 | -0.53 | 2.81   | 1.67e-01 | ENSG00000277656 | GSTT1   |       |        |          |
| ENSG00000171428 | NAT1    | -0.77 | 0.93   | 2.36e-01 | ENSG00000156006 | NAT2    |       |        |          |
| ENSG00000196502 | SULT1A1 | -0.23 | 5.81   | 2.77e-01 | ENSG00000196228 | SULT1C3 |       |        |          |
| ENSG00000172828 | CES3    | 0.26  | 3.96   | 2.79e-01 | ENSG00000109193 | SULT1E1 |       |        |          |
| ENSG00000128311 | TST     | -0.20 | 4.74   | 2.94e-01 | ENSG00000130540 | SULT4A1 |       |        |          |
| ENSG00000173597 | SULT1B1 | 0.77  | -0.28  | 3.03e-01 | ENSG00000138068 | SULT6B1 |       |        |          |
| ENSG00000172482 | AGXT    | 0.35  | 3.35   | 3.13e-01 | ENSG00000241635 | UGT1A1  |       |        |          |
| ENSG00000130005 | GAMT    | -0.18 | 4.86   | 3.31e-01 | ENSG00000244474 | UGT1A4  |       |        |          |
| ENSG00000141429 | GALNT1  | 0.15  | 6.18   | 3.55e-01 | ENSG00000241119 | UGT1A9  |       |        |          |
|                 |         |       |        |          | ENSG00000173610 | UGT2A1  |       |        |          |
|                 |         |       |        |          | ENSG00000109181 | UGT2B10 |       |        |          |
|                 |         |       |        |          | ENSG00000197888 | UGT2B17 |       |        |          |
|                 |         |       |        |          | ENSG00000135226 | UGT2B28 |       |        |          |
|                 |         |       |        |          | ENSG00000156096 | UGT2B4  |       |        |          |
|                 |         |       |        |          | ENSG00000145626 | UGT3A1  |       |        |          |
|                 |         |       |        |          | ENSG00000174607 | UGT8    |       |        |          |

**Figure S4.** Fold-changes and expression levels of genes related to phase II drug metabolism. Undetected genes are shown without data. FC: fold-change, CPM: counts per million, FDR: false discovery rate.

| EnsemblID       | Symbol  | logFC | logCPM | FDR      | EnsemblID       | Symbol   | logFC | logCPM | FDR      |
|-----------------|---------|-------|--------|----------|-----------------|----------|-------|--------|----------|
| ENSG00000117394 | SLC2A1  | 0.85  | 11.66  | 2.87e-09 | ENSG00000154265 | ABCA5    | -0.15 | 5.27   | 4.77e-01 |
| ENSG00000059804 | SLC2A3  | 0.73  | 11.04  | 1.47e-08 | ENSG00000163406 | SLC15A2  | 0.61  | -0.36  | 4.81e-01 |
| ENSG00000017483 | SLC38A5 | -0.57 | 6.92   | 5.22e-06 | ENSG00000112759 | SLC29A1  | 0.11  | 6.20   | 5.21e-01 |
| ENSG00000134294 | SLC38A2 | 0.69  | 10.25  | 8.30e-06 | ENSG00000137204 | SLC22A7  | -0.88 | -1.17  | 5.37e-01 |
| ENSG00000168003 | SLC3A2  | 0.59  | 6.76   | 1.83e-05 | ENSG00000155380 | SLC16A1  | -0.10 | 6.55   | 5.90e-01 |
| ENSG00000119688 | ABCD4   | -0.51 | 5.15   | 2.23e-04 | ENSG00000165240 | ATP7A    | 0.13  | 4.37   | 6.46e-01 |
| ENSG00000155465 | SLC7A7  | -0.48 | 5.74   | 5.40e-04 | ENSG00000117528 | ABCD3    | 0.09  | 5.54   | 6.47e-01 |
| ENSG00000165637 | VDAC2   | 0.47  | 8.24   | 1.10e-03 | ENSG00000103064 | SLC7A6   | 0.08  | 6.61   | 6.56e-01 |
| ENSG00000174640 | SLCO2A1 | 0.95  | 1.93   | 2.03e-03 | ENSG00000124574 | ABCC10   | 0.09  | 5.07   | 6.58e-01 |
| ENSG00000185883 | ATP6V0C | 0.40  | 6.28   | 3.97e-03 | ENSG00000107331 | ABCA2    | -0.08 | 6.82   | 6.62e-01 |
| ENSG00000165269 | AQP7    | -1.56 | 0.66   | 3.99e-03 | ENSG00000125257 | ABCC4    | -0.09 | 4.85   | 6.69e-01 |
| ENSG00000123191 | ATP7B   | -0.52 | 4.58   | 4.32e-03 | ENSG00000115657 | ABCB6    | -0.07 | 6.42   | 7.02e-01 |
| ENSG00000156222 | SLC28A1 | -0.96 | 2.56   | 4.44e-03 | ENSG00000176463 | SLCO3A1  | -0.33 | 0.39   | 7.07e-01 |
| ENSG00000168394 | TAP1    | -0.53 | 4.22   | 6.39e-03 | ENSG00000240583 | AQP1     | 0.16  | 4.26   | 7.12e-01 |
| ENSG00000103257 | SLC7A5  | 0.34  | 8.09   | 1.31e-02 | ENSG00000101187 | SLCO4A1  | 0.10  | 7.65   | 7.12e-01 |
| ENSG00000108846 | ABCC3   | 0.34  | 6.33   | 2.29e-02 | ENSG00000004864 | SLC25A13 | 0.07  | 4.76   | 7.57e-01 |
| ENSG00000141526 | SLC16A3 | 0.30  | 9.15   | 2.49e-02 | ENSG00000121270 | ABCC11   | 0.15  | 1.50   | 8.00e-01 |
| ENSG00000103222 | ABCC1   | 0.25  | 7.48   | 7.58e-02 | ENSG00000165029 | ABCA1    | -0.07 | 6.61   | 8.11e-01 |
| ENSG00000088386 | SLC15A1 | -1.27 | -0.32  | 7.71e-02 | ENSG00000174669 | SLC29A2  | 0.19  | 0.53   | 8.14e-01 |
| ENSG00000213585 | VDAC1   | 0.24  | 8.33   | 8.18e-02 | ENSG00000117479 | SLC19A2  | 0.06  | 4.53   | 8.35e-01 |
| ENSG00000013364 | MVP     | -0.26 | 7.67   | 9.78e-02 | ENSG00000084453 | SLCO1A2  | -0.42 | -1.42  | 8.63e-01 |
| ENSG00000154258 | ABCA9   | -1.15 | 0.30   | 1.03e-01 | ENSG00000198691 | ABCA4    | 0.13  | 1.62   | 8.72e-01 |
| ENSG00000146477 | SLC22A3 | -0.38 | 2.97   | 1.38e-01 | ENSG00000204574 | ABCF1    | -0.03 | 6.33   | 8.89e-01 |
| ENSG00000179869 | ABCA13  | 1.25  | -0.67  | 1.53e-01 | ENSG00000167972 | ABCA3    | 0.03  | 4.99   | 9.29e-01 |
| ENSG00000101986 | ABCD1   | 0.22  | 5.21   | 1.56e-01 | ENSG00000163581 | SLC2A2   |       |        |          |
| ENSG00000173638 | SLC19A1 | -0.22 | 4.64   | 2.31e-01 | ENSG00000138079 | SLC3A1   |       |        |          |
| ENSG00000136868 | SLC31A1 | 0.21  | 5.57   | 2.38e-01 | ENSG00000100170 | SLC5A1   |       |        |          |
| ENSG00000023839 | ABCC2   | -0.21 | 8.31   | 2.43e-01 | ENSG00000005471 | ABCB4    |       |        |          |
| ENSG00000143921 | ABCG8   | -0.70 | 0.52   | 2.57e-01 | ENSG00000125255 | SLC10A2  |       |        |          |
| ENSG00000085563 | ABCB1   | 0.43  | 1.59   | 3.00e-01 | ENSG00000100652 | SLC10A1  |       |        |          |
| ENSG00000114770 | ABCC5   | -0.18 | 5.49   | 3.43e-01 | ENSG00000112499 | SLC22A2  |       |        |          |
| ENSG00000204267 | TAP2    | -0.26 | 3.80   | 3.49e-01 | ENSG00000073734 | ABCB11   |       |        |          |
| ENSG00000151012 | SLC7A11 | -0.31 | 4.43   | 3.51e-01 | ENSG00000137860 | SLC28A2  |       |        |          |
| ENSG00000137491 | SLCO2B1 | -0.18 | 4.68   | 3.67e-01 | ENSG00000149452 | SLC22A8  |       |        |          |
| ENSG00000092068 | SLC7A8  | 0.31  | 2.18   | 3.94e-01 | ENSG00000197901 | SLC22A6  |       |        |          |
| ENSG00000021488 | SLC7A9  | 1.09  | -1.17  | 4.03e-01 | ENSG00000118777 | ABCG2    |       |        |          |
| ENSG00000147100 | SLC16A2 | 0.31  | 2.24   | 4.32e-01 | ENSG00000134538 | SLCO1B1  |       |        |          |
| ENSG00000175003 | SLC22A1 | -0.88 | -1.17  | 4.72e-01 | ENSG00000100191 | SLC5A4   |       |        |          |
|                 |         |       |        |          | ENSG00000111700 | SLCO1B3  |       |        |          |
|                 |         |       |        |          | ENSG00000103569 | AQP9     |       |        |          |
|                 |         |       |        |          | ENSG00000197506 | SLC28A3  |       |        |          |
|                 |         |       |        |          | ENSG00000135917 | SLC19A3  |       |        |          |
|                 |         |       |        |          | ENSG00000140798 | ABCC12   |       |        |          |
|                 |         |       |        |          | ENSG00000149742 | SLC22A9  |       |        |          |
|                 |         |       |        |          | ENSG00000144452 | ABCA12   |       |        |          |
|                 |         |       |        |          | ENSG00000004846 | ABCB5    |       |        |          |

**Figure S5.** Fold-changes and expression levels of genes related to phase III drug metabolism. Undetected genes are shown without data. FC: fold-change, CPM: counts per million, FDR: false discovery rate.

| EnsemblID       | Symbol | logFC | logCPM | FDR      |
|-----------------|--------|-------|--------|----------|
| ENSG00000131910 | NR0B2  | 0.73  | 4.19   | 3.20e-05 |
| ENSG00000111424 | VDR    | -0.91 | 3.31   | 9.59e-04 |
| ENSG00000163631 | ALB    | 0.59  | 2.40   | 7.45e-02 |
| ENSG00000101076 | HNF4A  | -0.17 | 6.45   | 2.93e-01 |
| ENSG0000012504  | NR1H4  | -0.58 | 0.61   | 4.27e-01 |
| ENSG00000106546 | AHR    | -0.16 | 4.29   | 4.56e-01 |
| ENSG00000131408 | NR1H2  | 0.13  | 5.10   | 4.73e-01 |
| ENSG00000025434 | NR1H3  | 0.15  | 4.48   | 4.74e-01 |
| ENSG00000144852 | NR1I2  | 0.05  | 3.43   | 9.05e-01 |
| ENSG00000143257 | CAR    |       |        |          |

**Figure S6.** Fold-changes and expression levels of albumin gene and nuclear receptor genes related to liver function. Undetected genes are shown without data. FC: fold-change, CPM: counts per million, FDR: false discovery rate.

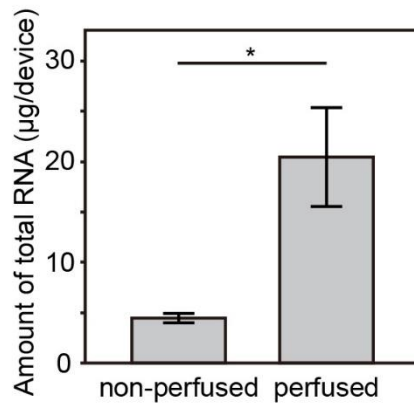

**Figure S7.** Amount of total RNA. The data are shown as mean  $\pm$  SE (n = 4 for non-perfused, and n = 3 for perfused). \* $p < 0.05$ , Student's t-test.



| GO ID      | Term                                           | p.adjust | Genes                                                                                                                |
|------------|------------------------------------------------|----------|----------------------------------------------------------------------------------------------------------------------|
| GO:0032870 | cellular response to hormone stimulus          | 8.88E-03 | SIK1, JUN, SLIT2, FOS, ROBO2, SIK1B, OXTR, DUSP1, ASNS                                                               |
| GO:0045766 | positive regulation of angiogenesis            | 1.87E-02 | SERPINE1, TERT, NODAL, VEGFC, PRKD1, CCBE1, DDAH1, FLT1, CD34, CXCL8, ADM, HGF                                       |
| GO:0007267 | cell-cell signalling                           | 2.46E-02 | ADRA1B, IHH, IL11, SSTR1, ADRA2C, NTF3, GJA3, ZYX, CTGF, CYR61, FGF5, GDF15, BARX1, ADM, BDNF                        |
| GO:0001525 | angiogenesis                                   | 4.39E-02 | NRXN3, SERPINE1, ANXA2, NDNF, PRKD1, VEGFC, KLF5, S1PR1, TNFRSF12A, JUN, SAT1, CTGF, COL8A1, ITGA5, LEP, FLT1, CXCL8 |
| GO:0001706 | endoderm formation                             | 4.44E-02 | DUSP5, NOG, DUSP4, DUSP2, DUSP1                                                                                      |
| GO:0035914 | skeletal muscle cell differentiation           | 1.05E-01 | KLF5, ANKRD1, ATF3, HIVEP3, FOS, ASB2, EGR1                                                                          |
| GO:0000188 | inactivation of MAPK activity                  | 1.20E-01 | DUSP10, DUSP5, DUSP8, DUSP4, DUSP2, DUSP1                                                                            |
| GO:0060395 | SMAD protein signal transduction               | 1.24E-01 | ATOH8, JUN, NODAL, BTBD11, FOS, AFP, GDF15, SMAD9                                                                    |
| GO:0007268 | chemical synaptic transmission                 | 1.45E-01 | CHRNA4, PLP1, GPR176, CACNB4, KCNN1, GRIA1, CACNA1G, KCNQ5, GABBR2, GPR1, SSTR1, OPRD1                               |
| GO:0010811 | positive regulation of cell-substrate adhesion | 1.92E-01 | NDNF, COL8A1, CCDC80, ITGA5, CYR61, ABI3BP                                                                           |

**Figure S8.** Top 10 biological processes enriched in the perfused condition.

| GO ID      | Term                                                       | p.adjust | Genes                                                                                                                                                                                          |
|------------|------------------------------------------------------------|----------|------------------------------------------------------------------------------------------------------------------------------------------------------------------------------------------------|
| GO:0007186 | G-protein coupled receptor signalling pathway              | 1.50E-07 | AKR1C3, ADGRV1, ACKR4, GPR119, PTGIR, NMUR1, GPR68, PTGER1, ADGRF4, AKR1C2, ADGRF2, CCR10, CCR7, CX3CL1, RGS16, EDNRA, SFRP2, MRGPRF, C5, CCL14, CCL5, RGS6, ADGRD1, ADGRE2, ADCYAP1R1, GPR153 |
| GO:0006955 | immune response                                            | 9.55E-04 | CD36, OAS2, SPN, ACKR4, IL10, AIRE, TNFSF12-TNFSF13, CCR10, CCR7, CX3CL1, IL24, IFI6, IL1R1, CCL14, C1R, CCL5, IL6, IL1RL1                                                                     |
| GO:0070374 | positive regulation of ERK1 and ERK2 cascade               | 1.26E-03 | CD36, S100A7, HTR2A, FGA, C5AR2, FGB, FGG, CCR7, CX3CL1, CCL14, EPO, CCL5, GPNMB, IL6                                                                                                          |
| GO:0006954 | inflammatory response                                      | 1.78E-03 | AL049839.2, BMPR1B, C5AR2, PTGIR, PTGER1, GPR68, IL10, CCR7, IL24, CDO1, C5, SCG2, CCL14, CCL5, SPP1, IL6, TNFAIP6, ADGRE2, S100A9                                                             |
| GO:0022617 | extracellular matrix disassembly                           | 2.05E-03 | MMP20, MMP2, MMP9, MMP13, MMP1, A2M, SPP1, ADAMTS5, CTSK, DCN                                                                                                                                  |
| GO:0006953 | acute-phase response                                       | 2.74E-03 | AL049839.2, HP, ITIH4, LBP, EPO, TFR2, IL6                                                                                                                                                     |
| GO:0007202 | activation of phospholipase C activity                     | 4.88E-03 | EDNRA, HTR2A, NMUR1, ARHGAP6, PLCB2, ADCYAP1R1                                                                                                                                                 |
| GO:0007155 | cell adhesion                                              | 5.20E-03 | CD36, AC068234.1, SELPLG, COMP, CYP1B1, THBS4, CX3CL1, CDH15, DPT, SELL, SPON2, LAMA4, SPP1, ITGB3, MFAP4, GPNMB, HABP2, CD24, ADAM12, SEMA5A, TNFAIP6, ADGRE2                                 |
| GO:0007204 | positive regulation of cytosolic calcium ion concentration | 6.68E-03 | CD36, EDNRA, C5AR2, PTGIR, GIPR, PTGER1, C1QTNF1, CD24, CCR10, CCR7                                                                                                                            |
| GO:0006508 | proteolysis                                                | 1.36E-02 | MMP13, MMP1, PCSK1, ADAMTS14, ADAMTS5, CTSK, C1S, ADAMTS13, MMP2, MMP20, MMP9, PAPP, CPZ, ADAM33, C1R, NAALADL1, HABP2, ADAM12, CTSF                                                           |

**Figure S9.** Top 10 biological processes enriched in the non-perfused condition.

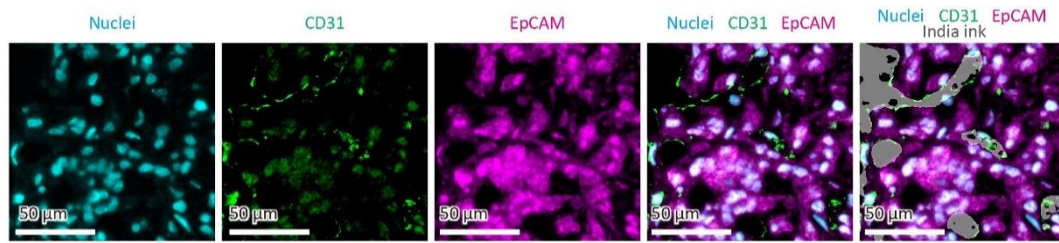

**Figure S10.** Immunostaining of the tissue infused with India ink. The experiment was performed as follows. After cultivation in the perfused condition, the tissue was infused with India ink via the main channel immediately before fixation. Subsequently, the tissue was embedded in paraffin, sectioned, and immunostained with anti-CD31 and anti-EpCAM antibodies. India ink extracted from the bright field image based on a threshold was superimposed with the fluorescent image.

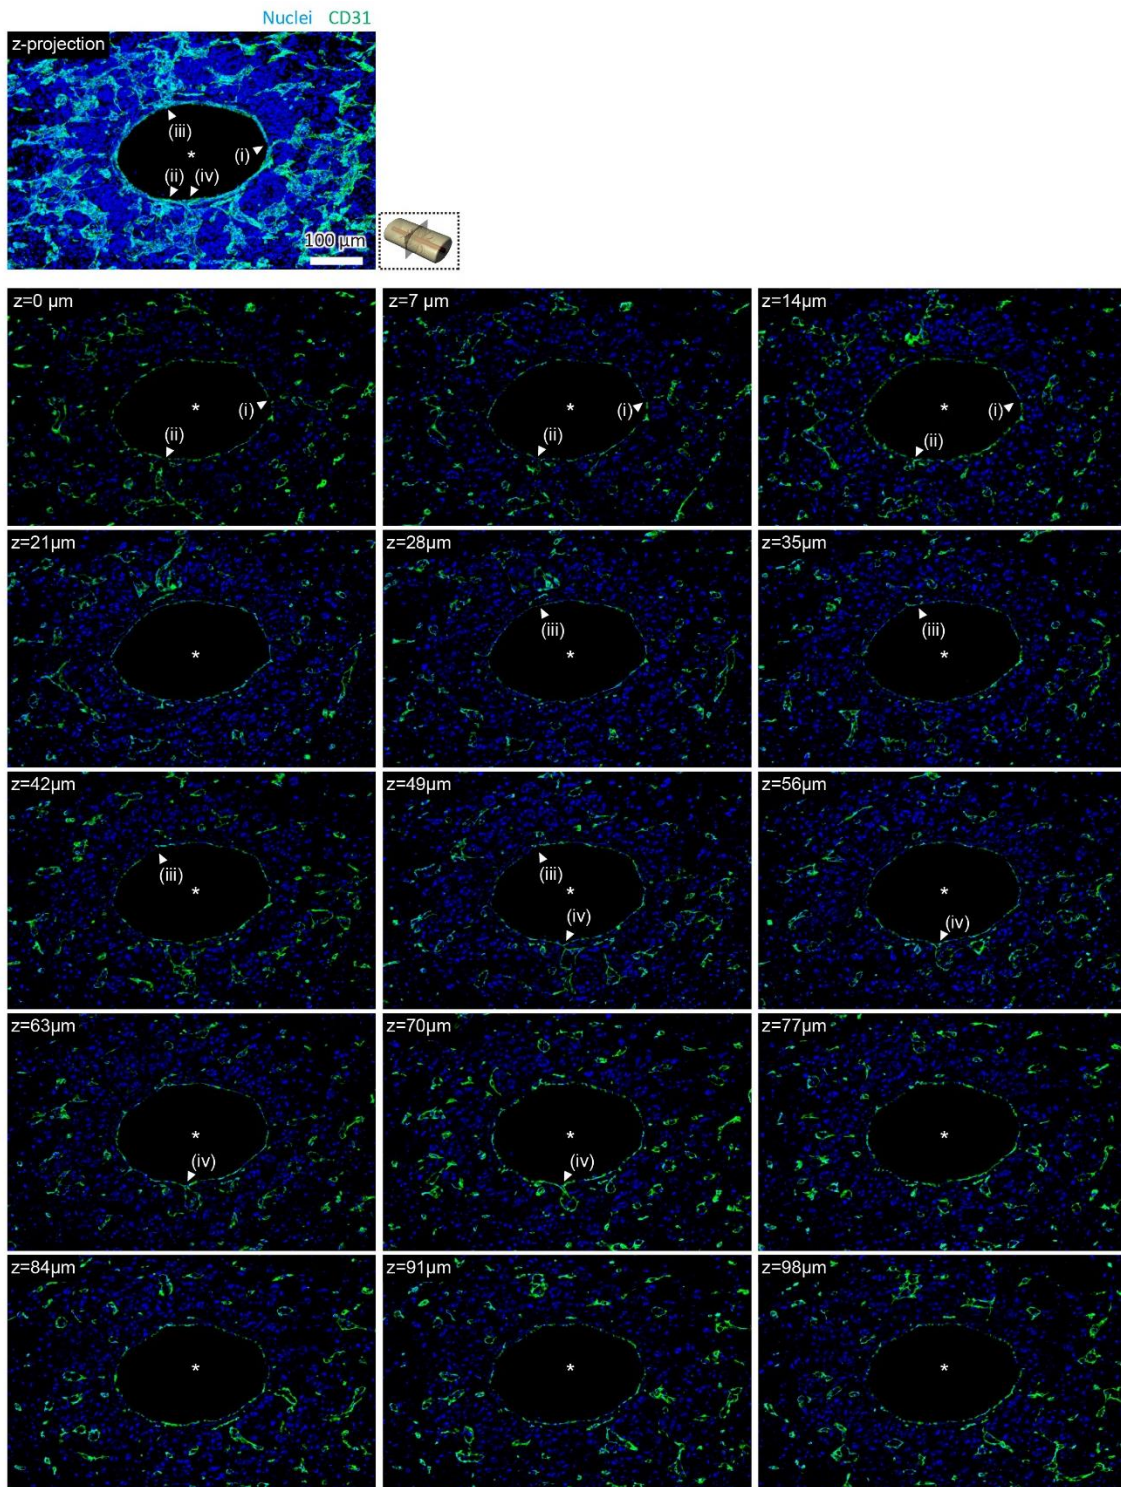

**Figure S11.** Immunostaining of serial sections. The main channel and branches of the sinusoid-like structures from the main channel are indicated by an asterisk and arrowheads, respectively. The experiment was performed as follows. Serial sections of

the tissue cultured in the perfused condition were made at a thickness of 7  $\mu\text{m}$ . The sections were stained using an anti-CD31 antibody and ImmPRESS Reagent and ImmPACT DAB (Vector Laboratories, Inc., Burlingame, CA, USA) according to the manufacturer's instructions, and counterstained with haematoxylin. The images of the immunostained sections were processed with ImageJ. First, the images were aligned using the StackReg plug-in. Subsequently, the colours of nuclei and CD31 were extracted by colour deconvolution and converted to pseudo colours. Although EGM was used as a culture medium for this experiment, it would not significantly affect the results.

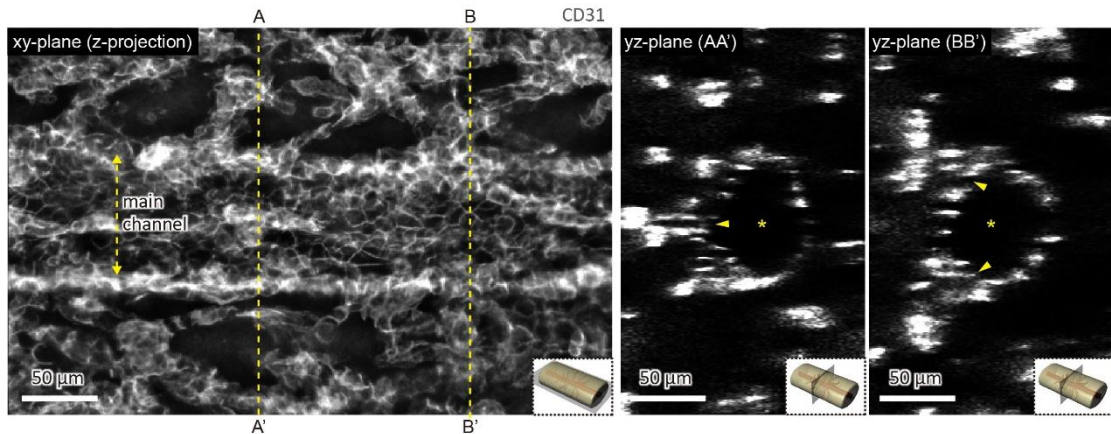

**Figure S12.** Three-dimensional confocal image of the whole tissue. The main channel is indicated by a dotted line with arrow heads in the xy-plane and asterisks in the yz-planes. The branches of sinusoid-like structures from the main channel are indicated by arrowheads in the yz-planes. The experiment was performed as follows. The tissue cultured in the perfused condition was fixed, immunostained for CD31, and cleared with CUBIC (Tokyo Chemical Industry Co., Ltd., Tokyo, Japan) according to the manufacturer's instruction since the tissue was too thick to observe. The tissue was observed with a confocal microscope. The acquired image was deconvolved with the Richardson-Lucy algorithm (20 iterations) using the DeconvolutionLab plug-in of ImageJ to improve the contrast and resolution. Although EGM was used as a culture medium and normal MSCs were used instead of immortalised MSCs for this experiment, this would not significantly affect the results.

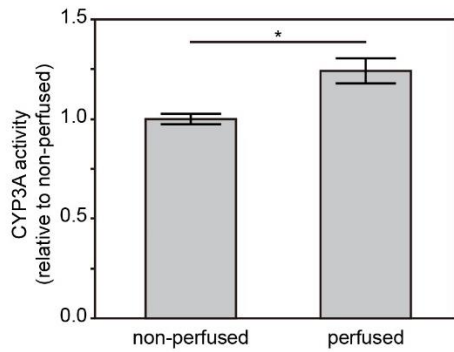

**Figure S13.** Measurement of CYP3A activity in tissues cultured in non-perfused and perfused conditions. CYP3A activity was measured based on the P450-Glo Assay (Promega, Madison, WI, USA) according to the manufacturer's instruction. Briefly, the culture medium was changed to that containing luciferin-PFBE at day 2. Subsequently, the tissue was perfused with medium in the perfused condition, whereas the tissue was only submerged in the medium in the non-perfused condition. The medium in the culture dish was sampled at day 7 and mixed with luciferin detection reagent. The luminescence intensity, which represents CYP3A activity, was measured with a luminometer. The data are shown as the mean  $\pm$  SE ( $n = 3$ ).  $*p < 0.05$ , Student's t-test.



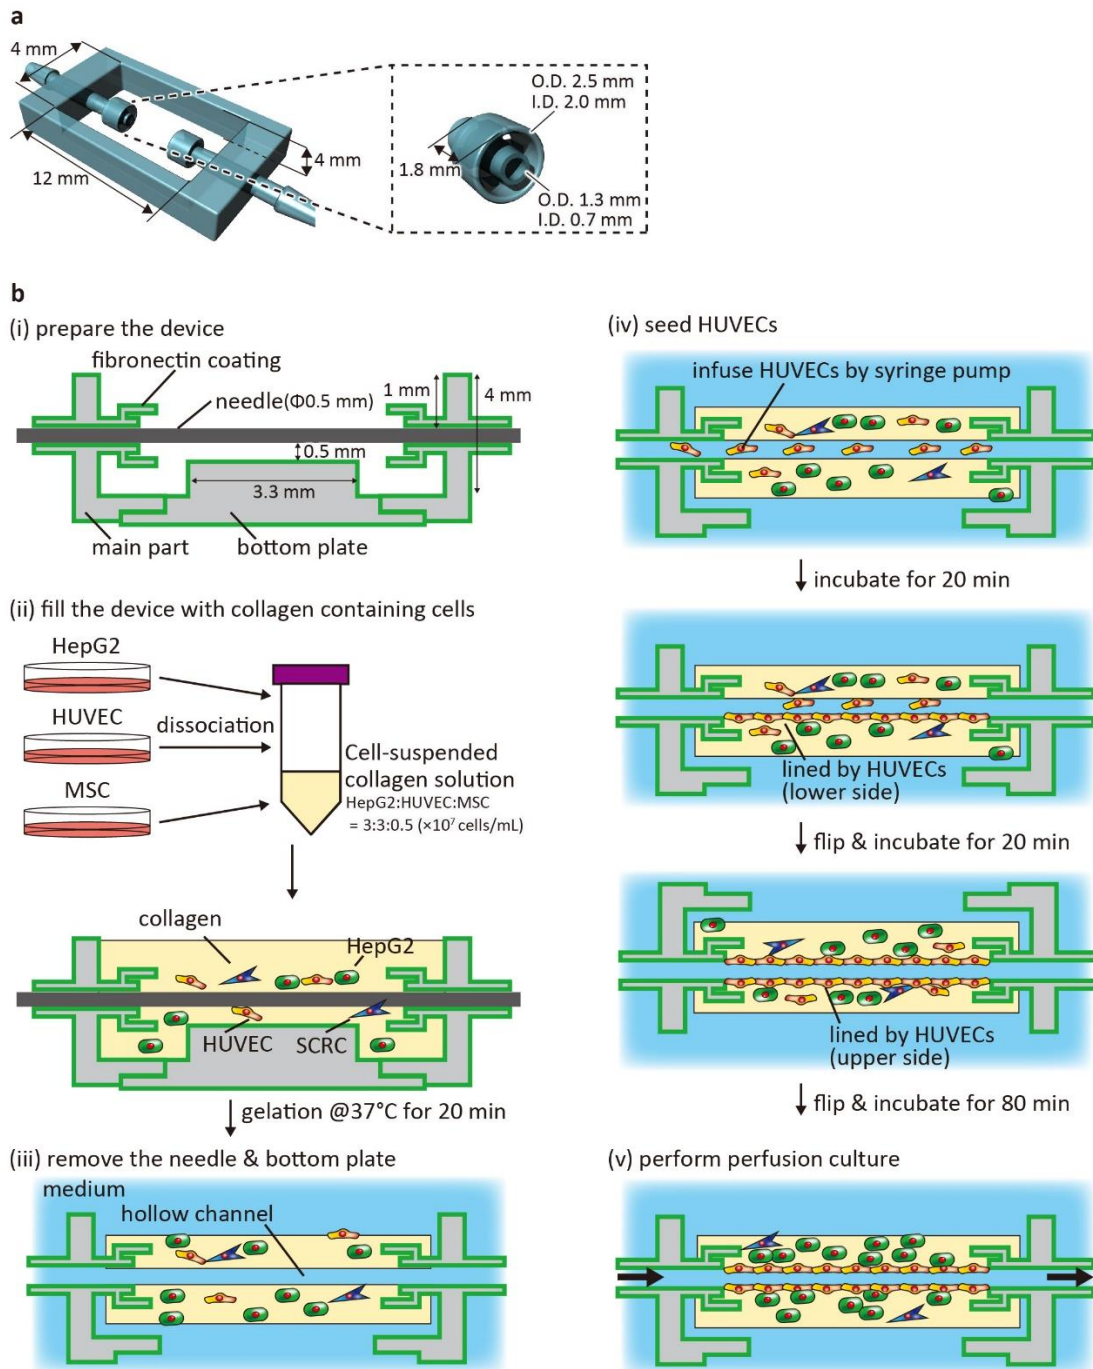

**Figure S14.** Details of tissue construction. (a) Dimensions of the device. (b) Step-by-step procedure: (i) The device was treated with air plasma and coated with fibronectin. The bottom plate was set for sealing. A needle (25 G) was inserted through the connectors. (ii) Cells were dissociated from the culture dishes and suspended in neutralised type I

collagen solution. The cell-suspended collagen solution was poured into the device and incubated for 20 minutes at 37 °C for gelation. (iii) The needle was removed to make a hollow channel. The bottom plate was also removed to expose the tissue to the medium. The device was submerged in the medium. (iv) The suspension of HUVECs was infused into the hollow channel using a syringe pump. The device was incubated in a CO<sub>2</sub> incubator for 20 minutes to cover the lower side of the channel with HUVECs. The device was inverted again and incubated for another 80 minutes for the further adhesion of HUVECs. (v) Perfusion is started using a peristaltic pump.
